# Supplementary material for: Assessment of fine-scale resource selection and spatially explicit habitat suitability modelling for a re-introduced tiger (Panthera tigris) population in central India
Source: PeerJ. 2017 Nov 3;5:e3920. doi: 10.7717/peerj.3920 (PMC5672835; doi:10.7717/peerj.3920)
Supplement: Supplemental Information 1 — Table S1: Background information on the tigers and telemetry data used for fine scale-habitat selection analyses (F: female, M: male, W: wild, SW: Semi wild, a: GPS fixes, b: Location collected through VHF telemetry). [file peerj-05-3920-s001.docx]

**Table S1:**Basic information of reintroduced tigers and telemetry data used for habitat selection study (F: female, M: male, W: wild, SW: Semi wild, a: GPS fixes, b: Location collected through VHF telemetry)

| **Tiger (Sex)** | **Areal Distance (Km)** | **Age at 1st Collaring**  **(Months)** | **Body Weight**  **(Kg)** | **Initial Exploration (Translocated individuals)** | | | **Initial Home Range (Founder and offspring)** | | |
| --- | --- | --- | --- | --- | --- | --- | --- | --- | --- |
|  |  |  |  | Duration | N (Location) | Ẋ (Location/day) ± SD | Duration | N (Location) | Ẋ (Location/day) ± SD |
| T1 (F-W) | 155 | 48 | 140 | 3rd Mar 2009-15th Aug 2009 | 1395a | 9.52 ± 2.66 | 21st Sep2011-14th April 2012 | 526 a | 2.55 ± 2.88 |
| T2 (F-W) | 270 | 54 | 150 | 9th Mar 2009-31st Aug 2009 | 1380 a | 7.87 ± 2.33 | 23rd Sep 2011- 10th Aug 2012 | 562 a | 1.74 ± 2.44 |
| T3 (M-W) | 283 | 78 | 200 | 6th Nov 2009 -31st Jan 2010 | 557 a | 6.48 ± 1.41 | 1st Sep 2011 - 29th June 2012 | 560 a | 1.95 ± 2.73 |
| T4 (F-SW) | 270 | 54 | 106 | 26th Mar 2011-31st Aug 2011 | 1895 a | 11.99 ± 7.14 | 23rd Jun 2012- 16th Aug 2012 | 174 a | 3.16 ± 2.84 |
| T5 (F-SW) | 270 | 54 | 95 | 13th Nov 2011-31st Jan2012 | 635 b | 7.93 ± 6.84 | 1st April 2012-23rd July 2012 | 621b | 5.40 ± 7.28 |
| T6 (F-W) | 280 | 48 | 105 | 23rd January 2015-31st March 2015 | 641 a | 9.42 ± 1.22 | - | - | - |
| P111 (M-W) | - | 21 | 130 | - | - | - | 6th Jul 2012- 29th Oct 2012 | 675 b | 5.87± 5.75 |
| P212 (M-W) | - | 19 | 110 | - | - | - | 6th Aug 2012- 30th Nov 2012 | 741b | 6.68 ± 5.84 |
| P213 (F-W) | - | 19 | 87 | - | - | - | 1st Aug 2012-31st Oct 2012 | 660 b | 7.25± 6.18 |

S
